# Supplementary material for: Quantified effect of seawater biogeochemistry on the temperature dependence of sea spray aerosol fluxes
Source: Copernicus journal article supplement (doi:10.5194/acp-23-12949-2023), 2023-10-16
Supplement: Supplementary file 1 [file acp-23-12949-2023-supplement.pdf]

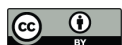

*Supplement of*

## **Quantified effect of seawater biogeochemistry on the temperature dependence of sea spray aerosol fluxes**

**Karine Sellegri et al.**

*Correspondence to:* Karine Sellegri ([karine.sellegri@uca.fr](mailto:karine.sellegri@uca.fr))

The copyright of individual parts of the supplement might differ from the article licence.

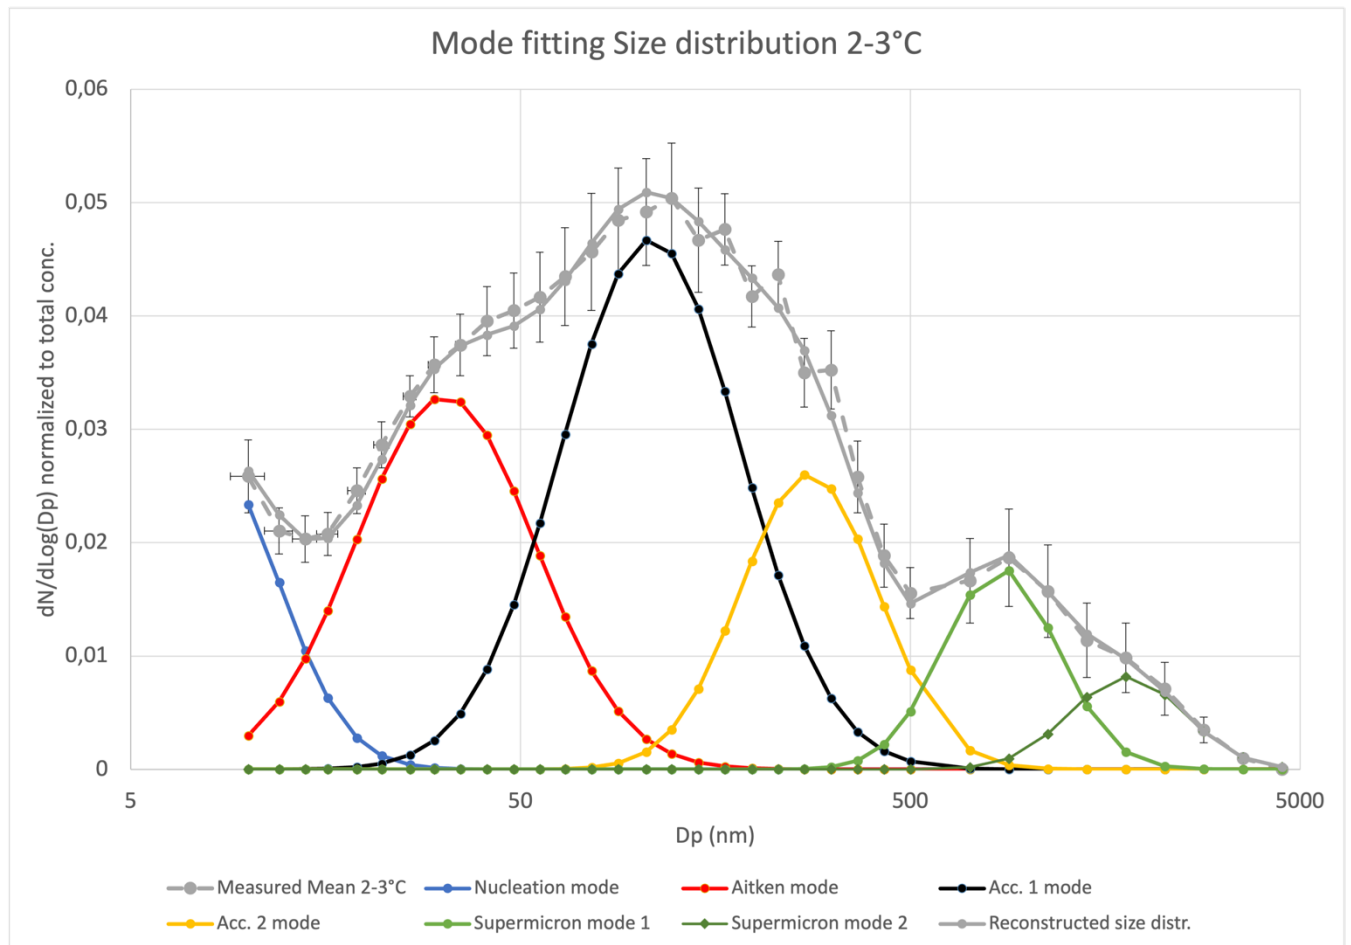

**Figure S1: Measured sea-spray size distributions from merged SMPS and WIBS data, normalized to the total sea-spray concentrations and averaged for the temperature range 2-3 °C (dash grey line). Decomposition in a combination of single log-normal modes show the nucleation mode (blue), Aitken mode (red), first accumulation mode (black), second accumulation mode (yellow) and the two coarse modes (light and dark green) and reconstructed size distribution from the addition of individual modes (plain grey line). Error bars are from standard deviation on the averaged measured size distributions.**

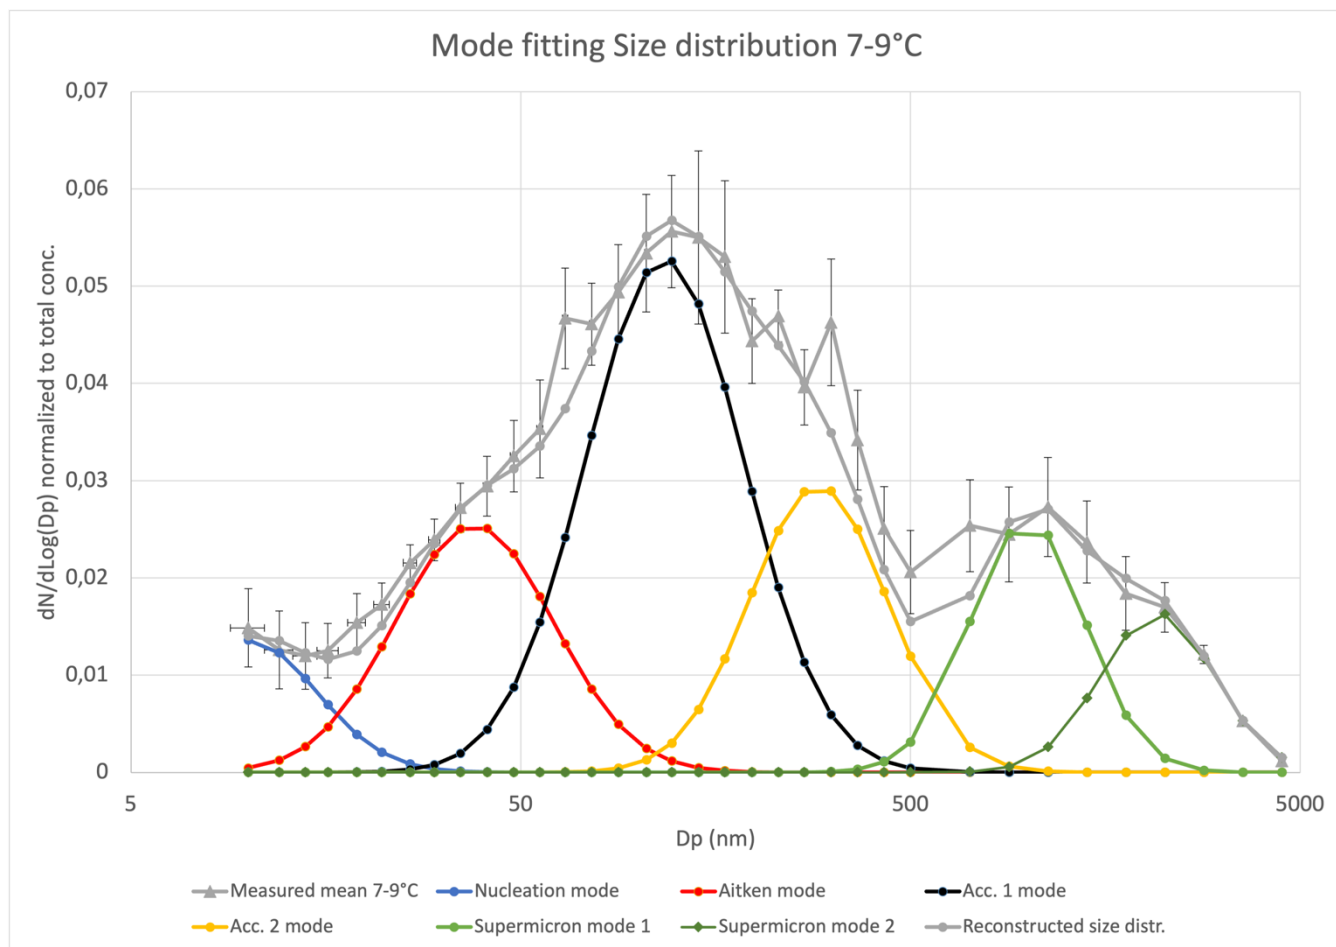

Figure S2: Same as S1 for the temperature range 7-9 °C.
